# Supplementary material for: Cabozantinib targets bone microenvironment modulating human osteoclast and osteoblast functions
Source: PubMed Central journal article supplement (PMC5386748; doi:10.18632/oncotarget.15390), 2017-02-16
Supplement: oncotarget-08-20113-s001.pdf [file oncotarget-08-20113-s001.pdf]

# Cabozantinib targets bone microenvironment modulating human osteoclast and osteoblast functions

## SUPPLEMENTARY FIGURES

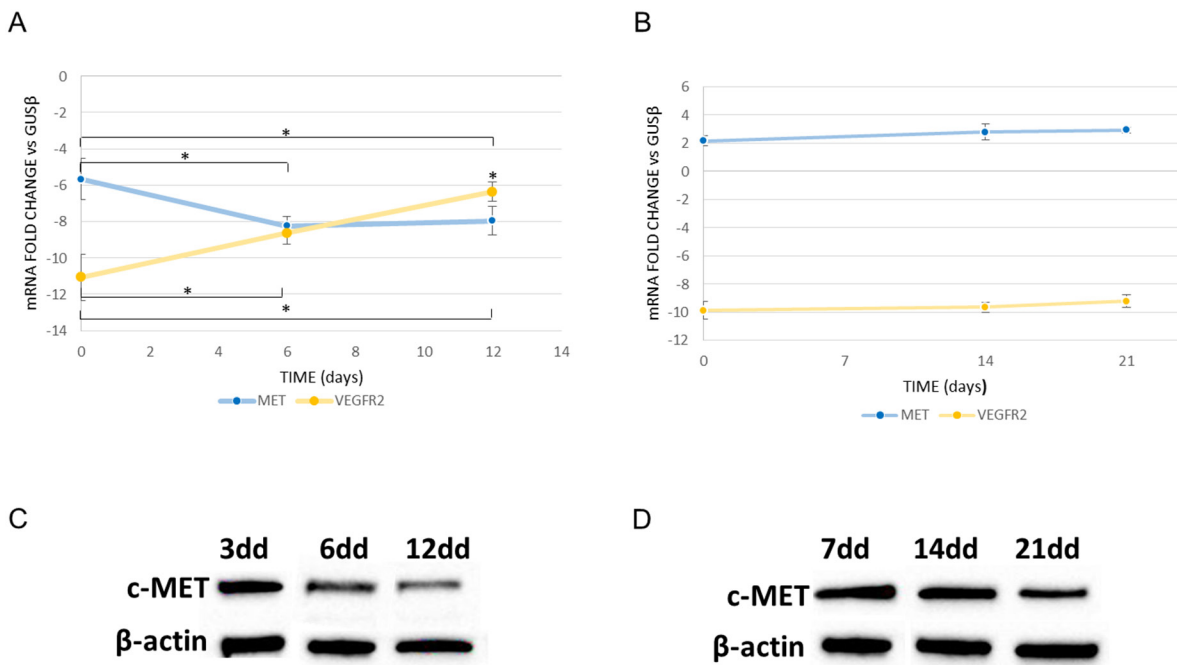

Supplementary Figure 1: c-MET and VEGFR2 gene and protein expression levels detected during osteoclast A e C. and osteoblast B e D. differentiation. \*(p < 0.05).

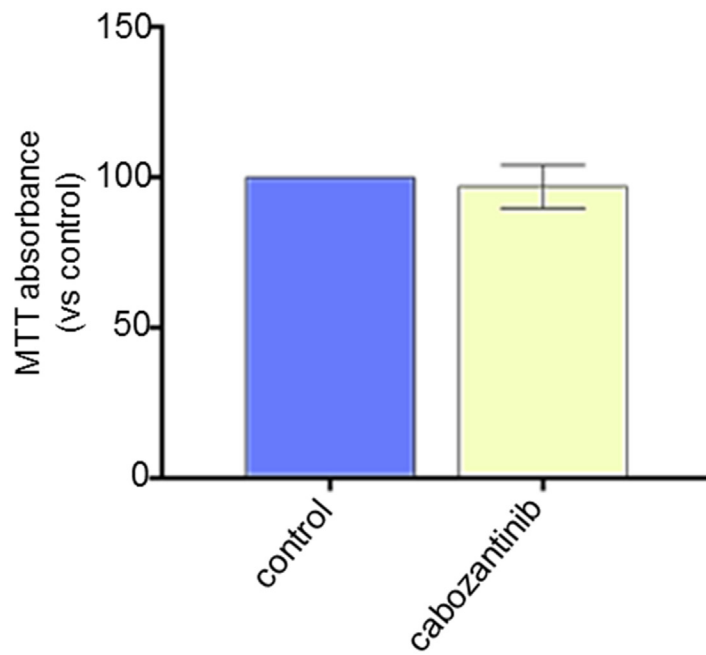

Supplementary Figure 2: Effect of cabozantinib treatment on osteoclast viability (MTT assay).

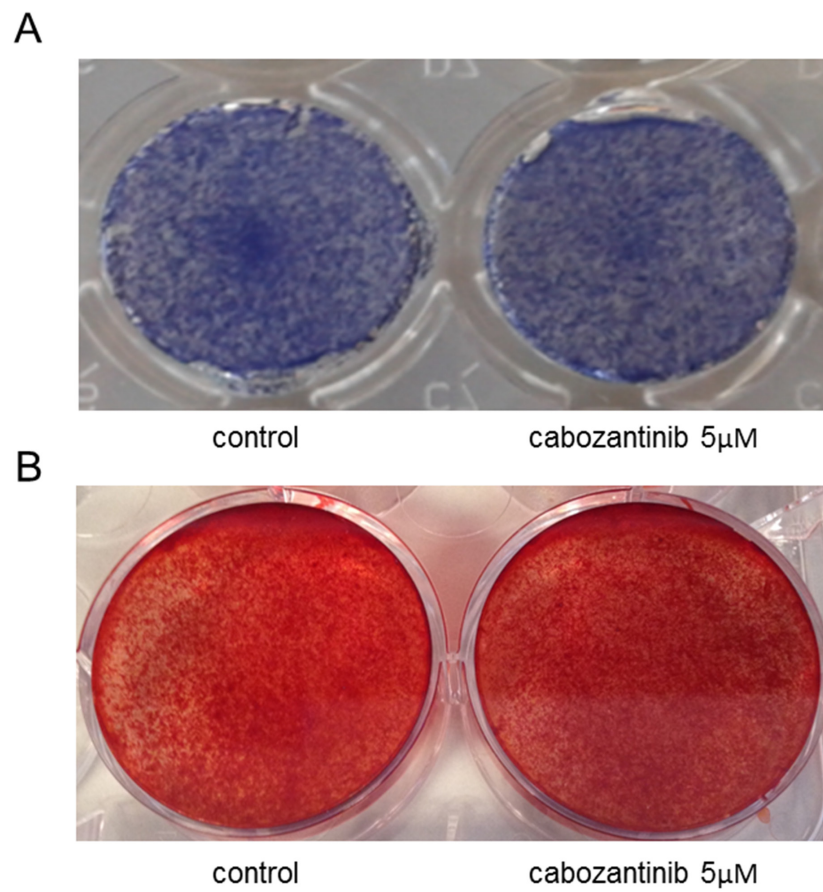

**Supplementary Figure 3: Effect of cabozantinib treatment on osteoblast differentiation and activity.** Representative images of ALP **A.** and Alizarin Red assay **B.** in untreated (DMSO) and treated osteoblasts.
